# Supplementary material
Source: publisher figshare collection journal article supplement (https://asha.figshare.com/articles/dataset/_/5558107)
Supplement: Supplementary file 1 [file 1]

**Supplemental Material S1.** Results for participants who produced paraphasias.

|                       |                     | All ( <i>N</i> = 18) | LvPPA ( <i>n</i> = 5) | NFvPPA ( <i>n</i> = 8) | SvPPA ( <i>n</i> = 5) |
|-----------------------|---------------------|----------------------|-----------------------|------------------------|-----------------------|
| Paraphasia type       | Mixed               | 7                    | 2                     | 1                      | 4                     |
|                       | Formal              | 32                   | 16                    | 9                      | 7                     |
|                       | Non-word            | 63                   | 10                    | 43                     | 10                    |
| Part of speech        | Noun                | 52                   | 15                    | 27                     | 10                    |
|                       | Proper Noun         | 12                   | 2                     | 7                      | 3                     |
|                       | Pronoun             | 1                    | 0                     | 1                      | 0                     |
|                       | Verb                | 22                   | 7                     | 8                      | 7                     |
|                       | Adjective           | 8                    | 2                     | 6                      | 0                     |
|                       | Adverb              | 4                    | 0                     | 3                      | 1                     |
|                       | Preposition         | 3                    | 2                     | 1                      | 0                     |
| Target word frequency | Mean (SD)           | 397.7 (1145.7)       | 441.2 (1043.6)        | 261.3 (886)            | 684.2 (1726.1)        |
|                       | Median              | 16.6                 | 27.1                  | 11.7                   | 43.7                  |
|                       | Range               | 0.03 – 7438.3        | 1.15 – 4252.6         | 0.03 – 4367.1          | 1.98 – 7438.3         |
| Segment in error      | Vowel               | 49                   | 13                    | 26                     | 10                    |
|                       | Consonant Singleton | 42                   | 15                    | 16                     | 11                    |
|                       | Cluster             | 44                   | 9                     | 29                     | 6                     |
| Word position         | Initial             | 21                   | 6                     | 8                      | 7                     |
|                       | Medial              | 17                   | 1                     | 10                     | 6                     |
|                       | Final               | 10                   | 5                     | 5                      | 0                     |
| Type of error         | Addition Sound      | 32                   | 5                     | 20                     | 7                     |
|                       | Addition Syllable   | 12                   | 4                     | 6                      | 2                     |
|                       | Deletion Sound      | 35                   | 12                    | 22                     | 1                     |
|                       | Deletion Syllable   | 9                    | 4                     | 5                      | 0                     |
|                       | Substitution        | 82                   | 24                    | 34                     | 24                    |
|                       | Sequencing          | 8                    | 2                     | 3                      | 3                     |
| Degree of change      | One                 | 21                   | 5                     | 10                     | 6                     |
|                       | Two                 | 17                   | 5                     | 7                      | 5                     |
|                       | Three               | 3                    | 2                     | 0                      | 1                     |
